# Anatomically Compartmentalized Human Immunodeficiency Virus Replication in HLA-DR<sup>+</sup> Cells and CD14<sup>+</sup> Macrophages at the Site of Pleural Tuberculosis Coinfection

Stephen D. Lawn,<sup>1,2,a</sup> Tracy L. Pisell,<sup>2</sup>  
Christina S. Hirsch,<sup>3</sup> Mianda Wu,<sup>3</sup> Salvatore T. Butera,<sup>2</sup>  
and Zahra Toossi<sup>3</sup>

<sup>1</sup>Tuberculosis and Mycobacteriology and <sup>2</sup>HIV and Retrovirology Branches, Division of AIDS, STD, and TB Laboratory Research, Centers for Disease Control and Prevention, Atlanta, Georgia; <sup>3</sup>Department of Medicine, Case Western Reserve University, University Hospitals of Cleveland, Cleveland, Ohio

This study examined the impact of the host inflammatory microenvironment associated with localized tuberculosis (TB) on human immunodeficiency virus type 1 (HIV-1) replication within lymphocytes and macrophages *in vivo*. Paired plasma and pleural fluid samples from HIV-1-infected individuals with pleural TB ( $n = 9$ ) were analyzed. Detection of host proteins incorporated into the HIV-1 envelope by immunomagnetic capture analysis provided insight into the phenotype of cells supporting HIV-1 replication. The results indicated that the 4.0-fold greater median HIV-1 load in pleural fluid, compared with median load in plasma ( $P < .01$ ), was derived in part from viral replication within HLA-DR<sup>+</sup> cells, CD26<sup>+</sup> lymphocytes, and, importantly, CD14<sup>+</sup> macrophages. Greatly increased local concentrations of proinflammatory cytokines and immune activation markers in the pleural space correlated with the virologic findings. In summary, HIV-1 replication was increased at sites of *Mycobacterium tuberculosis* coinfection within activated cells, including lymphocytes and CD14<sup>+</sup> macrophages.

Opportunistic infections augment the generalized immune activation that drives viral replication and CD4<sup>+</sup> lymphocyte turnover in human immunodeficiency virus type 1 (HIV-1)-infected persons (reviewed in [1]). By promoting HIV-1 replication in this way, immune-activating stimuli may be associated with increases in systemic virus load [2–5], greater viral genotypic diversity [6, 7], accelerated disease progression [8, 9], and enhanced HIV-1 transmission risk [10].

Worldwide, tuberculosis (TB) is one of the most prevalent opportunistic infections in HIV-infected persons. Development of active TB is associated with immune activation [11–13] and

increased HIV-1 load in the systemic circulation [2]. However, HIV-1 replication may be even more greatly enhanced at anatomical sites of active *Mycobacterium tuberculosis* (MTB) coinfection. In HIV-infected persons with tuberculous meningitis, virus load in cerebrospinal fluid is higher than that in blood [14], and, in those with pulmonary TB, HIV-1 load is greater in diseased lung segments than in segments that are not inflamed [15]. Indeed, induction of HIV-1 replication resulting from localized inflammatory stimuli may be markedly compartmentalized from replication occurring systemically [16].

Induction of HIV-1 replication by immune-activating stimuli *in vivo* also is detectable within body tissues and at the cellular level [17–19]. Genotypic analysis of HIV-1 within microdissected splenic white pulps revealed exquisite compartmentalization of HIV-1 quasi species, suggesting that highly localized enhancement of HIV-1 replication occurs in association with antigenic stimulation [19]. The relationship between activation of lymphocytes and HIV-1 replication *in vitro* is well characterized (reviewed in [20]), and levels of cell-free HIV-1 *in vivo* are thought to be maintained by continuous rounds of *de novo* infection in short-lived, activated lymphocytes [21]. However, reports are contradictory regarding the activating effects of MTB infection and bacterial lipopolysaccharide stimulation on HIV-1 entry and replication within cells of the monocytic lineage *in vitro* [22–31]. *In vivo*, cells of the monocytic lineage generally are thought to contribute little to the cell-free virus pool [32], although it is suggested that they are likely to become a more productive site of HIV-1 replication during opportunistic infections (reviewed in [33]). However, the results of 2 previous studies that aimed to determine whether macrophages serve as productive sources of viral rep-

Received 19 April 2001; revised 27 July 2001; electronically published 25 September 2001.

Presented in part: HIV Pathogenesis Keystone Symposium, Keystone, Colorado, March 2001 (abstract 146).

Informed written consent was obtained from all study participants before their inclusion in this study. The study protocol conforms with the human experimentation guidelines of the US Department of Health and Human Services and was approved by the Institutional Review Board at Case Western Reserve University, Cleveland, and the Ugandan National AIDS Research Subcommittee, Kampala, Uganda.

Financial support: Wellcome Trust of London (to S.D.L.); Research Participation Program (administered by Oak Ridge Institute for Science and Education, Oak Ridge, TN; to S.D.L.); National Institutes of Health (HL-51636 and AI-45244).

<sup>a</sup> Present affiliation: Division of Infectious Diseases, St. George's Hospital Medical School, London, United Kingdom.

Reprints or correspondence: Dr. Stephen D. Lawn, Division of Infectious Diseases, St. George's Hospital Medical School, Cranmer Terrace, London, SW17 0RE, United Kingdom (stevelawn@yahoo.co.uk).

The Journal of Infectious Diseases 2001;184:1127–33

© 2001 by the Infectious Diseases Society of America. All rights reserved.  
0022-1899/2001/18409-0006\$02.00

lication in HIV-infected individuals with mycobacterial coinfection are contradictory [18, 34].

Since host cell-surface proteins are incorporated into the HIV-1 envelope during viral budding, HIV-1 acquires an envelope phenotype that reflects that of the host cell (reviewed in [35]). Analysis of cell-free HIV-1 in clinical specimens by immunomagnetic virus capture analysis, therefore, provides an extremely useful means of gaining insight into the phenotype of the cells supporting viral replication *in situ* [36]. In the present study, analysis of paired plasma and pleural fluid samples from HIV-1-infected individuals with pleural TB enabled us to determine the impact of the host inflammatory microenvironment on cellular compartments of HIV-1 replication at discrete sites of MTB coinfection. Correlation of the virologic data with measurements of concentrations of proinflammatory cytokines and immune activation markers provided important insights into the local impact of mycobacterial coinfection on HIV-1 replication.

## Patients and Methods

**Patients and clinical samples.** Samples from HIV-1-infected patients with newly diagnosed pleural TB (TB/HIV) were selected from among those collected during a previous study conducted in Kampala, Uganda, by the Case Western Reserve–Makerere Research Collaboration [37]. Diagnoses of pleural TB were confirmed by culture of MTB or by finding caseating granulomas or acid-fast bacilli (or both) in pleural biopsy specimens. HIV-1 RNA concentrations in the plasma and pleural fluid samples had previously been measured (Z. Toossi, J. L. Johnson, R. A. Kanost, M. Wu, H. Luzze, P. Peters, A. Okwera, M. Jolobay, P. Mugenyi, H. Aung, J. J. Ellner, and C. S. Hirsch, unpublished data) by use of the Amplicor HIV-1 Monitor Assay (version 1.5; Roche Diagnostic Systems). In the present study, paired plasma and pleural fluid samples from TB/HIV patients ( $n = 9$ ) were selected if  $\geq 6 \times 10^4$  HIV-1 particles were present in each sample. This is the minimum quantity of HIV-1 that permits immunomagnetic virus envelope phenotyping analysis, using  $\geq 3$  different antibodies ( $2 \times 10^4$  virions per capture), as described below.

**HIV-1 envelope phenotyping by immunomagnetic virus capture.** Monoclonal antibodies bound to magnetic beads were used to target host proteins incorporated into the HIV-1 envelope and thereby selectively capture virus derived from specific cell pools, as described elsewhere [36]. Antibodies directed against CD14 and CD36 selectively capture virus derived from cells of the monocytic lineage, and monoclonal antibody directed against CD26 selectively captures virus derived from lymphocytes [36]. In addition, detection of HLA-DR incorporated in the HIV-1 envelope provides an index of the activation of the mononuclear cells (both lymphocytes and macrophages) supporting HIV-1 replication [13, 16, 38, 39]. Immunomagnetic virus capture using antibodies directed against CD44 (expressed by all mononuclear cells) and CD19 (expressed by B cells) provides the positive and negative controls, respectively [36].

As described elsewhere [36], HIV-1 in both plasma and pleural fluid samples was purified before virus capture to remove anti-HIV antibodies and other inhibitory proteins, such as acute-phase pro-

teins and soluble forms of the targeted receptors. In brief, virus was pelleted by ultracentrifugation, was salt-treated by mixing with sodium chloride (final concentration, 0.5 M), and was purified by passage through Microspin S-400 HR sephacryl columns (Pharmacia Biotech). Sheep anti-mouse IgG magnetic beads (Dyna) were conjugated with monoclonal antibodies directed against the target host cell proteins ( $0.5 \mu\text{g}$  antibody/ $1.6 \times 10^7$  beads). Equal inputs of purified virus ( $2 \times 10^4$  virions) were incubated with each of the antibody-conjugated beads on a rotator at 4°C for 4 h in the presence of 5% normal human serum. Unbound virus was washed from the beads, virus specifically captured by the antibody-conjugated beads was lysed, and the HIV-1 RNA was quantified (Amplicor HIV-1 monitor test; Roche Diagnostic Systems).

**Measurement of concentrations of immune markers.** ELISAs were used to measure concentrations of proinflammatory cytokines and immune activation markers, including tumor necrosis factor (TNF)- $\alpha$  (Medgenix Biosource), interleukin-6, interferon (IFN)- $\gamma$ , soluble (s) CD25, sCD14,  $\beta_2$ -microglobulin, and sTNF-receptor type I (sTNF-RI; R&D Systems). All assays were done according to the manufacturers' protocols.

**Statistical analysis.** Prism software (version 2.0; GraphPad Software) was used for the analysis. HIV-1 RNA concentrations and markers of immune activation approximated normal distributions. We used *t* tests to compare the concentrations of these variables in plasma and pleural fluid. Statistical significance was defined as  $P \leq .05$ .

## Results

**Patient characteristics.** The HIV-1-infected study participants ( $n = 9$ ) had a median age of 25.5 years (range, 22–35 years) and a median CD4<sup>+</sup> lymphocyte count of  $164 \times 10^6$  cells/L (range,  $34$ – $374 \times 10^6$  cells/L). The median HIV-1 RNA concentration at the site of TB in pleural fluid ( $5.1 \log_{10}$  RNA copies/mL; range,  $3.0$ – $5.8 \log_{10}$  RNA copies/mL) was 4.0-fold greater than that in plasma ( $4.5 \log_{10}$  RNA copies/mL; range,  $2.4$ – $5.3 \log_{10}$  RNA copies/mL;  $P < .002$ ).

**Incorporation of HLA-DR into the HIV-1 envelope is increased in pleural fluid, compared with plasma.** Immunomagnetic HIV-1 capture analysis, with antibody directed against CD44 (positive control), enabled a significant level ( $\geq 3.0$ -fold over background) of HIV-1 to be captured from all samples; the mean levels of HIV-1 captured from plasma and pleural fluid samples by using this antibody were similar (figure 1). To address the hypothesis that MTB coinfection promotes HIV-1 replication in activated HLA-DR<sup>+</sup> mononuclear cells *in situ*, we compared the levels of cell-free HIV-1 bearing HLA-DR in plasma and pleural fluid samples. A significant level of HIV-1 was captured from all but one sample, using antibody directed against HLA-DR. However, in marked contrast to capture levels obtained when anti-CD44 antibody was used, the mean level of virus captured from pleural fluid when anti-HLA-DR antibody was used was significantly greater than that from plasma (figure 1). Calculation of the efficiency of virus capture confirmed that the mean proportion of the HIV-1 pool specifi-

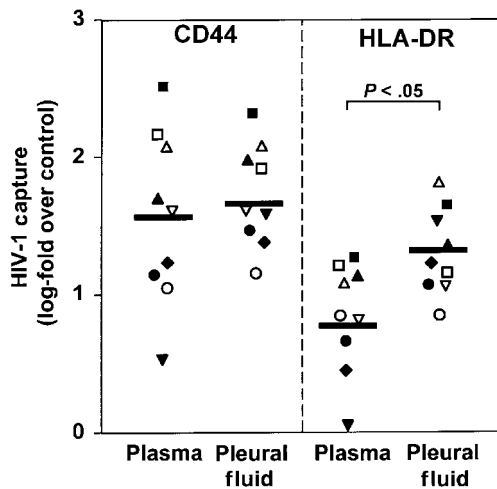

**Figure 1.** Increased capture of human immunodeficiency virus type 1 (HIV-1) from pleural fluid, compared with that from plasma, using anti-HLA-DR antibody. Equal amounts of HIV-1 ( $2 \times 10^4$  virions/capture) in paired plasma and pleural fluid samples obtained from patients with pleural tuberculosis and HIV-1 coinfection ( $n = 9$ ) were analyzed by immunomagnetic capture. Monoclonal antibodies directed against CD44 (positive control), HLA-DR, and CD19 (negative control) were used. Different symbols for each patient indicate the level of HIV-1 captured by using antibodies to CD44 and HLA-DR, and bars show mean levels of virus capture. Although the mean levels of virus captured by using antibody directed against CD44 did not differ significantly between plasma and pleural fluid samples, the mean level of HIV-1 captured by antibody to HLA-DR was significantly greater from pleural fluid than from plasma ( $P < .05$ ).

cally captured by anti-HLA-DR antibody ([anti-HLA-DR capture – anti-CD19 capture]  $\times$  100/virus input) was greater from pleural fluid (mean  $\pm$  SE,  $9.7\% \pm 2.1\%$ ) than from plasma ( $4.7\% \pm 0.7\%$ ;  $P < .05$ ).

**Lymphocyte- and macrophage-derived HIV-1.** More extensive virus envelope analysis was done by immunomagnetic capture to gain insight into the cellular origin of HIV-1 present in the systemic circulation and in the pleural space. A greater quantity of virus was required for this analysis, and we were able to generate data from 8 of 9 pleural fluid samples, together with 5 of the paired plasma samples. Data from 2 representative patients are presented (figure 2). Using antibody directed against the lymphocyte-specific antigen CD26, a significant level of HIV-1 was captured from each of the plasma ( $n = 5$ ) and pleural fluid ( $n = 8$ ) samples tested. Thus, lymphocyte-derived virus was present in both anatomical compartments.

In contrast to lymphocyte-derived virus, there was strict anatomical compartmentalization of macrophage-derived HIV-1 captured by use of antibodies directed against CD36 and CD14 (figure 2). Macrophage-derived HIV-1 bearing CD14 in the envelope was detected exclusively within pleural fluid at the site of TB coinfection. In contrast, although HIV-1 bearing CD36 was detected in a proportion of both sample types, in individual patients this virus phenotype was present exclusively in either

plasma or pleural fluid and never in both compartments (figure 2). The mean percentages of input HIV-1 captured by cell type-specific antibodies further illustrate the anatomical compartmentalization of macrophage-derived viruses bearing CD14 or CD36 in the virus envelope (table 1) and are similar in magnitude to those captured from analysis of plasma virus obtained from patients with pulmonary TB, as described elsewhere [36].

**Concentrations of immune-activation markers in plasma and pleural fluid.** Concentrations of proinflammatory cytokines and soluble immune markers in pleural fluid were elevated, compared with levels in plasma (figure 3), indicating intense local immune activation at the site of TB infection. IFN- $\gamma$  [40]

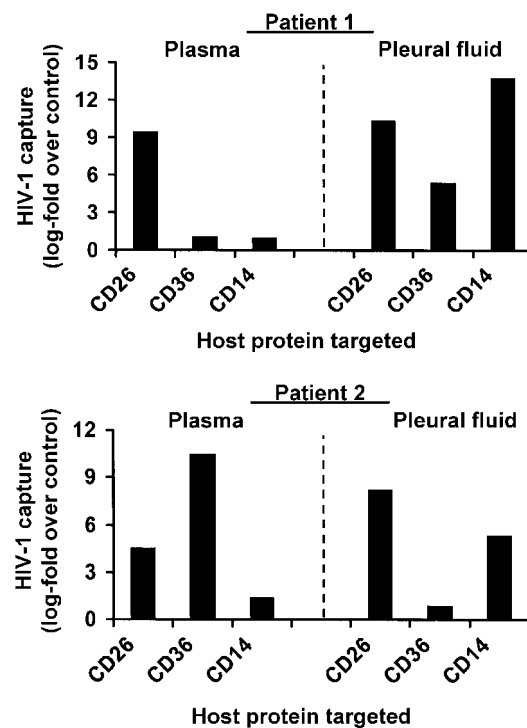

**Figure 2.** Detection of lymphocyte- and macrophage-derived human immunodeficiency virus type 1 (HIV-1) in plasma and pleural fluid samples from patients with pleural tuberculosis (TB). Immunomagnetic HIV-1 capture analysis was done, using monoclonal antibodies directed against CD26 (lymphocyte specific) and CD14 and CD36 (macrophage specific) host proteins incorporated into the HIV-1 envelope during budding. A significant level ( $\geq 3.0$ -fold over background) of HIV-1 was captured from all study samples by use of the positive control anti-CD44 antibody (figure 1). As illustrated by results for samples from 2 representative patients, lymphocyte-derived virus (bearing CD26) was detected in all pleural fluid ( $n = 8$ ) and paired plasma samples ( $n = 5$ ) tested. In marked contrast, HIV-1 bearing CD14 was present only at the site of *Mycobacterium tuberculosis* coinfection, being detected in 7 pleural fluid samples but in no plasma samples. Also, although HIV-1 bearing CD36 was detectable in 2 pleural fluid and 3 plasma samples, in each patient it was present exclusively in one compartment or the other. Thus, there was strict anatomical compartmentalization of macrophage-derived viruses, with CD14<sup>+</sup> being the dominant phenotype of macrophages supporting HIV-1 replication at the site of TB coinfection.

**Table 1.** Immunomagnetic capture of lymphocyte- and macrophage-derived human immunodeficiency virus type 1 (HIV-1) from plasma and pleural fluid samples from 5 patients coinfecting with pleural tuberculosis and HIV-1.

| Patient sample | Targeted host protein |           |                        |                        |           |
|----------------|-----------------------|-----------|------------------------|------------------------|-----------|
|                | CD44                  | CD26      | CD36                   | CD14                   | CD19      |
| Plasma         | 23.6 (8.6)            | 3.5 (1.4) | 5.0 (2.5) <sup>a</sup> | 1.0 (0.4) <sup>a</sup> | 0.9 (0.5) |
| Pleural fluid  | 25.7 (6.0)            | 3.9 (1.6) | 1.5 (0.9) <sup>a</sup> | 6.9 (2.7) <sup>a</sup> | 0.7 (0.3) |

NOTE. Data are mean ( $\pm$ SE) percentage of input HIV-1 captured from paired samples from patients for whom data were available from analysis of both samples. Cell type-specific antibodies were used to target CD44 (positive control), CD26 (lymphocyte derived), CD36 and CD14 (macrophage derived), and CD19 (negative control) host antigens in the HIV-1 envelope. HIV-1 bearing CD14 was the predominant macrophage-derived virus type in pleural fluid, whereas HIV-1 bearing CD36 was the predominant macrophage-derived virus type in plasma.

<sup>a</sup> Differences in HIV-1 capture from plasma and from pleural fluid did not reach statistical significance ( $P > .2$  for each).

and sCD25 [41] are derived predominantly from activated lymphocytes, and sCD14 is shed exclusively by cells of the monocytic lineage [42] in persons with HIV infection, TB, or dual infection [43]. Relative increases in concentrations of each of these markers in the pleural space, compared with plasma, indicate local activation of both lymphocyte and macrophage cell pools within the inflammatory microenvironment at the site of TB coinfection. Since elevated serum concentrations of sTNF-R1 and  $\beta_2$ -microglobulin correlate independently with the presence of TB and HIV-1 infection, respectively [12], increased concentrations of these markers indicate a significant immunologic impact of each infection within the pleural space.

## Discussion

The data in this study suggest that the inflammatory microenvironment associated with pleural TB has an important impact on HIV-1 replication in coinfecting persons. The pro-inflammatory response in the pleural space was associated with compartmentalized increases in HIV-1 replication and detection of an increased proportion of the HIV-1 pool bearing HLA-DR within the virus envelope. In addition to lymphocytes, local CD14<sup>+</sup> macrophages made a significant contribution to the level of HIV-1 within the pleural space. Limited viral genotyping data also suggest that HIV-1 replication within activated HLA-DR<sup>+</sup> cells may lead to increased viral diversity (data not shown). Together, these data provide unique insight into the impact of opportunistic MTB infection on HIV-1 pathogenesis at active sites of inflammation.

Activated mononuclear cells expressing HLA-DR are the most productive source of HIV-1 replication in vivo [44]. HLA-DR is incorporated into the envelope of HIV-1 as it buds from either macrophages or lymphocytes [36, 38], and its presence in the virus envelope correlates with host cell activation [13, 16, 39]. We have shown previously that detection of HIV-1 bearing HLA-DR is greater in plasma of persons with pulmonary TB than in plasma of HIV-infected control persons

with no opportunistic infection [13, 38]. The results of the present study extend this important observation, which indicates that MTB coinfection results in increased production of HIV-1 from activated HLA-DR<sup>+</sup> cells present within the inflammatory microenvironment at the site of disease. Since the presence of HLA-DR within the virus envelope enhances HIV-1 infectivity [45, 46], this phenomenon may represent an important additional mechanism whereby mycobacterial coinfections promote the local propagation of HIV-1, contributing to local increases in virus load. Moreover, interaction of virions bearing HLA-DR with T lymphocytes induces apoptosis [47], potentially increasing the frequency of apoptotic mononuclear cell death that occurs at sites of MTB and HIV-1 coinfection [37]. Despite the interesting observation that monocytes infected with high levels of MTB in vitro have reduced expression of HLA-DR [48, 49], HIV-1 replication at the site of the pleural TB in the present study is likely to have been induced in a wide pool of HLA-DR<sup>+</sup> cells, including activated lymphocytes and macrophages that were not infected by the bacterium.

Detection of both macrophage- and lymphocyte-derived HIV-1 in pleural fluid samples suggests that both mononuclear cell populations contributed to the increased virus load: median virus load was 4.0-fold greater in the pleural space than in plasma. Of importance, HIV-1 bearing the macrophage-specific antigen CD14 was detected in pleural fluid but in none of the plasma samples examined. The presence in the pleural space of virus derived from CD14<sup>+</sup> macrophages must have resulted from local replication at the site of TB infection and not from trafficking of virus from the systemic circulation. These data, therefore, indicate that mycobacterial coinfections have an important impact on HIV-1 replication within macrophages in vivo, which supports our earlier findings [36] and those of Orenstein et al. [18] and contradicts those of Van der Ende et al. [34]. Since macrophages represent long-lived reservoirs of HIV-1, increased infection within this cellular pool may contribute to sustained elevation of HIV-1 load [13], accelerated decline in immune function, and shortened survival [9] in HIV-infected persons treated for TB.

The striking compartmentalization of detectable HIV-1 with either CD14 or CD36 present in the virus envelope is likely to reflect differential expression of these antigens by cells of the monocytic lineage present in the 2 anatomic compartments. A key mycobacterial cell wall lipopolysaccharide, lipoarabinomannan, up-regulates CD14 expression by cells of the monocytic lineage [50], and engagement of this receptor by lipoarabinomannan induces TNF- $\alpha$  secretion [51] and HIV-1 transcription [28]. This provides a plausible mechanism by which the presence of MTB results in selective enhancement of HIV-1 replication within CD14<sup>+</sup> cells in the pleural space. Although HIV-1 bearing CD14 was not detected in the plasma of these HIV-infected individuals with pleural TB, it was detected earlier in those with pulmonary TB [36], possibly as a consequence of the marked lipoarabinomannan antigenemia that is present in persons with

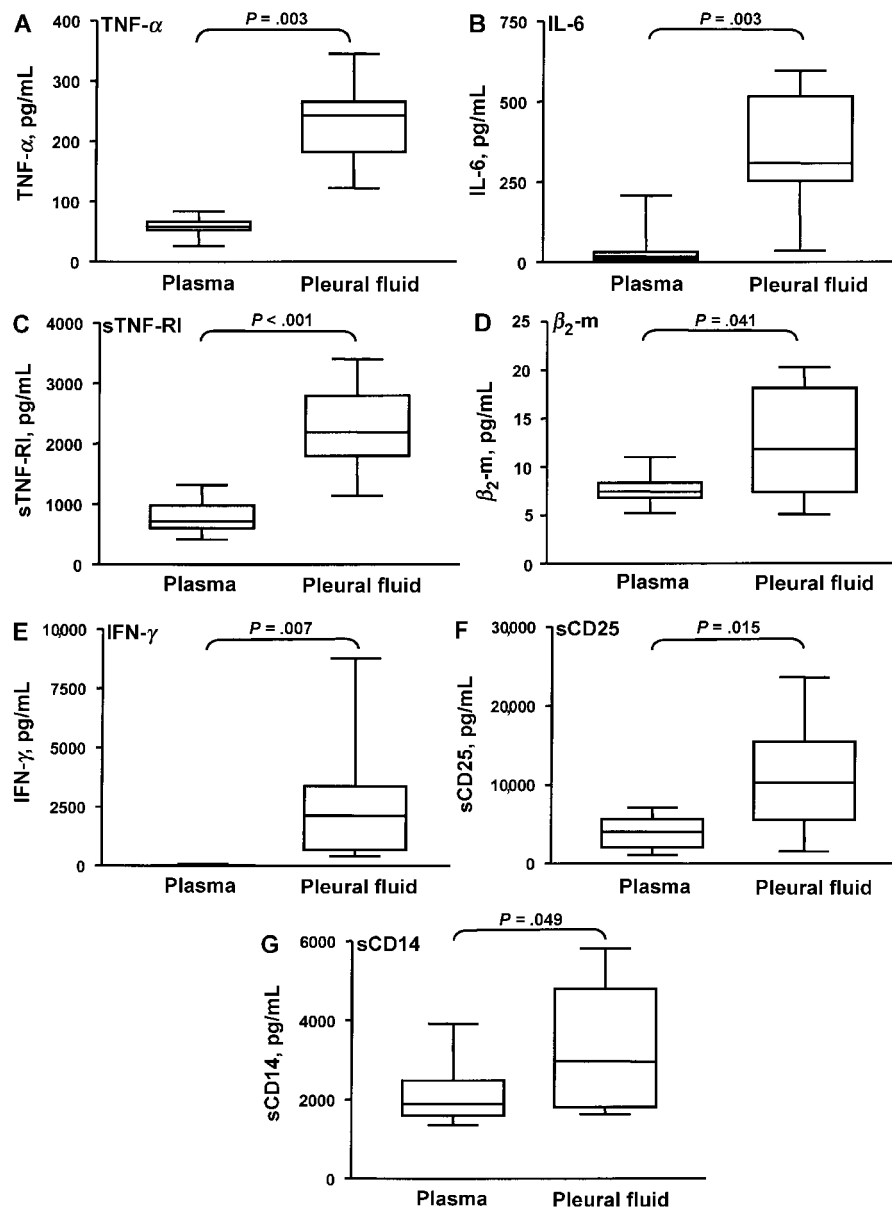

**Figure 3.** Compartmentalized immune activation within the pleural space in patients with pleural tuberculosis and human immunodeficiency virus type 1 coinfection ( $n = 9$ ). Concentrations of tumor necrosis factor (TNF)- $\alpha$  (A), interleukin (IL)-6 (B), soluble (s) TNF-receptor type I (sTNF-RI; C),  $\beta_2$ -microglobulin ( $\beta_2$ -m; D), interferon (IFN)- $\gamma$  (E), sCD25 (F), and sCD14 (G) were all significantly increased in pleural fluid, compared with plasma. Box and whisker plots indicate median values, 25th and 75th percentiles, and ranges of values.

pulmonary but not pleural TB [52]. In contrast to CD36, monocyte expression of CD36 is transiently up-regulated during the early phase of differentiation into macrophages, but it decreases with further cell maturation [53] and with cell exposure to bacterial lipopolysaccharide [54]. Thus, the finding of CD14 and not CD36 as the predominant macrophage-derived antigen in pleural fluid is likely to reflect induction of HIV-1 replication within local macrophages that were fully differentiated and were activated by exposure to mycobacterial products.

We suggested previously that the low efficiency of HIV-1 capture using antibodies to cell type-specific markers may be due, in part, to the inhibitory effect of plasma proteins and may reflect the inability to capture virus with an envelope antigen density below a critical threshold [36]. The efficiency of capture of in vitro-propagated stocks of macrophage- and lymphocyte-derived HIV-1, using antibodies to target CD36 and CD26, is also  $<25\%$ , even in the absence of inhibitory plasma proteins [36]. Thus, it is likely that the proportion of macrophage-derived HIV-1 pres-

ent in plasma of persons with TB is substantially greater than the ~5% detected in this study. Limitations in capture efficiency restrict the immunomagnetic capture technique to making semi-quantitative analysis of virus production from different cell pools, and the relative contributions of these pools cannot be compared directly, since the efficiencies of virus capture using various cell type-specific antibodies differ.

Increased concentrations of proinflammatory cytokines and soluble immune markers in the pleural space demonstrate the presence of marked immune activation at the site of MTB infection and correlate with the virologic findings. TNF- $\alpha$  and interleukin-6 synergistically increase HIV-1 replication at transcriptional and posttranscriptional levels [55, 56], and increased concentrations may have induced HIV-1 replication in the pleural space. Both IFN- $\gamma$  and TNF- $\alpha$  up-regulate the expression of HLA-DR by mononuclear cells (reviewed in [57]), which supports the finding of increased incorporation of HLA-DR in the envelope of HIV-1 at the site of TB. Increased concentrations of cell type-specific soluble markers indicate activation of both lymphocytes and macrophages within the pleural space, corroborating the finding of virus derived from both cell populations in this compartment. Moreover, increased concentrations of sCD14 in pleural fluid also correlate with the frequent detection of CD14 in the envelope of macrophage-derived HIV-1 present within the pleural space.

In summary, the data in this study suggest that MTB coinfection in HIV-1-infected persons results in increased virus production from activated HLA-DR<sup>+</sup> mononuclear cells, including lymphocytes and CD14<sup>+</sup> macrophages present at the site of MTB infection. Increases in virus load and viral infection of long-lived macrophages, together with genotypic diversification, may contribute to acceleration of HIV-1 disease progression in persons with MTB coinfection.

## References

- Lawn SD, Butera ST, Folks TM. Contribution of immune activation to the pathogenesis and transmission of human immunodeficiency virus type 1 infection. *Clin Microbiol Rev* (in press).
- Goletti D, Weissman D, Jackson RW, et al. Effect of *Mycobacterium tuberculosis* on HIV replication. Role of immune activation. *J Immunol* **1996**; 157:1271–8.
- Sulkowski MS, Chaisson RE, Karp CL, Moore RD, Margolick JB, Quinn TC. The effect of acute infectious illnesses on plasma human immunodeficiency virus type 1 load and the expression of serologic markers of immune activation among HIV-infected adults. *J Infect Dis* **1998**; 178: 1642–8.
- Mole L, Ripich S, Margolis D, Holodniy M. The impact of active herpes simplex virus infection on human immunodeficiency virus load. *J Infect Dis* **1997**; 176:766–70.
- Bush CE, Donovan RM, Markowitz NP, Kvale P, Saravolatz LD. A study of HIV RNA viral load in AIDS patients with bacterial pneumonia. *J Acquir Immune Defic Syndr Hum Retrovirol* **1996**; 13:23–6.
- Ostrowski MA, Stanley SK, Justement JS, Gantt K, Goletti D, Fauci AS. Increased in vitro tetanus-induced production of HIV type 1 following in vivo immunization of HIV type 1-infected individuals with tetanus toxoid. *AIDS Res Hum Retroviruses* **1997**; 13:473–80.
- Collins KR, Mayanja-Kizza H, Sullivan BA, Quinones-Mateu ME, Toossi Z, Arts EJ. Greater diversity of HIV-1 quasispecies in HIV-infected individuals with active tuberculosis. *J Acquir Immune Defic Syndr* **2000**; 24:408–17.
- Bentwich Z, Kalinkovich A, Weisman Z. Immune activation is a dominant factor in the pathogenesis of African AIDS. *Immunol Today* **1995**; 16: 187–91.
- Whalen C, Horsbrough CR, Hom D, Lahart C, Simberkoff M, Ellner J. Accelerated course of HIV infection after tuberculosis. *Am J Respir Crit Care Med* **1995**; 151:129–35.
- Quinn TC, Wawer MJ, Sewankambo N, et al. Viral load and heterosexual transmission of human immunodeficiency virus type 1. Rakai Project Study Group. *N Engl J Med* **2000**; 342:921–9.
- Vanham G, Edmonds K, Qing L, et al. Generalised immune activation in pulmonary tuberculosis: coactivation with HIV infection. *Clin Exp Immunol* **1996**; 103:30–4.
- Lawn SD, Rudolph D, Wiktor S, Coulibaly D, Ackah A, Lal RB. Tuberculosis and HIV infection are independently associated with elevated serum concentrations of tumour necrosis factor receptor type 1 and beta2-microglobulin, respectively. *Clin Exp Immunol* **2000**; 122:79–84.
- Lawn SD, Shattock RJ, Acheampong JW, et al. Sustained plasma TNF- $\alpha$  and HIV-1 load despite resolution of other immune activation parameters during treatment for tuberculosis in Africans. *AIDS* **1999**; 13:2231–7.
- Morris L, Silber E, Sonnenberg P, et al. High human immunodeficiency virus type 1 RNA load in the cerebrospinal fluid from patients with lymphocytic meningitis. *J Infect Dis* **1998**; 177:473–6.
- Nakata K, Rom WN, Honda Y, Condos R, Kanegasaki S, Cao Y, Weiden M. *Mycobacterium tuberculosis* enhances human immunodeficiency virus-1 replication in the lung. *Am J Respir Crit Care Med* **1997**; 155:996–1003.
- Lawn SD, Subbarao S, Wright TC, et al. Correlation between HIV-1 RNA levels in the female genital tract and immune activation resulting from ulceration of the cervix. *J Infect Dis* **2000**; 181:1950–6.
- Stanley SK, Ostrowski MA, Justement JS, et al. Effect of immunization with a common recall antigen on viral expression in patients infected with human immunodeficiency virus type 1. *N Engl J Med* **1996**; 334:1222–30.
- Orenstein JM, Fox C, Wahl SM. Macrophages as a source of HIV during opportunistic infections. *Science* **1997**; 276:1857–61.
- Cheyrier R, Henrichwark S, Hadida F, et al. HIV and T cell expansion in splenic white pulps is accompanied by infiltration of HIV-specific cytotoxic T lymphocytes. *Cell* **1994**; 78:373–87.
- Copeland KF, Heeney JL. T helper cell activation and human retroviral pathogenesis. *Microbiol Rev* **1996**; 60:722–42.
- Ho DD, Neumann AU, Perelson AS, Chen W, Leonard JM, Markowitz M. Rapid turnover of plasma virions and CD4 lymphocytes in HIV-1 infection. *Nature* **1995**; 373:123–6.
- Rich EA, Chen IS, Zack JA, Leonard ML, O'Brien WA. Increased susceptibility of differentiated mononuclear phagocytes to productive infection with human immunodeficiency virus-1 (HIV-1). *J Clin Invest* **1992**; 89: 176–83.
- Toossi Z, Sierra-Madero JG, Blinkhorn RA, Mettler MA, Rich EA. Enhanced susceptibility of blood monocytes from patients with pulmonary tuberculosis to productive infection with human immunodeficiency virus type 1. *J Exp Med* **1993**; 177:1511–6.
- Shattock RJ, Friedland JS, Griffin GE. Phagocytosis of *Mycobacterium tuberculosis* modulates human immunodeficiency virus replication in human monocyte cells. *J Gen Virol* **1994**; 75:849–56.
- Lederman MM, Georges DL, Kusner DJ, Mudido P, Giam CZ, Toossi Z. *Mycobacterium tuberculosis* and its purified protein derivative activate expression of human immunodeficiency virus. *J Acquir Immune Defic Syndr* **1994**; 7:727–33.
- Zhang Y, Nakata K, Weiden M, Rom W. *Mycobacterium tuberculosis* enhances HIV-1 replication by transcriptional activation at the long terminal repeat. *J Clin Invest* **1995**; 95:2324–31.
- Pomerantz RJ, Feinberg MB, Trono D, Baltimore D. Lipopolysaccharide is

- a potent monocyte/macrophage-specific stimulator of human immunodeficiency virus type 1 expression. *J Exp Med* **1990**;172:253–61.
28. Bagasra O, Wright SD, Seshamma T, Oakes JW, Pomerantz RJ. CD14 is involved in control of human immunodeficiency virus type 1 expression in latently infected cells by lipopolysaccharide. *Proc Natl Acad Sci USA* **1992**;89:6285–9.
  29. Kornbluth RS, Oh PS, Munis JR, Cleveland PH, Richman DD. Interferons and bacterial lipopolysaccharide protect macrophages from productive infection by human immunodeficiency virus in vitro. *J Exp Med* **1989**;169:1137–51.
  30. Bernstein MS, Tong-Starksen SE, Locksley RM. Activation of human monocyte-derived macrophages with lipopolysaccharide decreases human immunodeficiency virus replication in vitro at the level of gene expression. *J Clin Invest* **1991**;88:540–5.
  31. Weiden M, Tanaka N, Qiao Y, et al. Differentiation of monocytes to macrophages switches the *Mycobacterium tuberculosis* effect on HIV-1 replication from stimulation to inhibition: modulation of interferon response and CCAAT/enhancer binding protein beta expression. *J Immunol* **2000**;165:2028–39.
  32. Perelson AS, Neumann A, Markowitz M, Leonard JM, Ho DD. HIV-1 dynamics in vivo: virion clearance rate, infected cell life-span, and viral generation time. *Science* **1996**;271:1582–6.
  33. Wahl SM, Greenwell-Wild T, Peng G, Hale-Donze H, Orenstein JM. Coinfection with opportunistic pathogens promotes human immunodeficiency virus type 1 infection in macrophages. *J Infect Dis* **1999**;179(Suppl 3):S457–60.
  34. Van der Ende ME, Schutten M, Raschdorff B, et al. CD4 T cells remain the major source of HIV-1 during end stage disease. *AIDS* **1999**;13:1015–9.
  35. Tremblay MJ, Fortin JF, Cantin R. The acquisition of host-encoded proteins by nascent HIV-1. *Immunol Today* **1998**;19:346–51.
  36. Lawn SD, Roberts BD, Griffin GE, Folks TM, Butera ST. Cellular compartments of HIV-1 replication: determination by virion-associated host proteins and the impact of opportunistic infection in vivo. *J Virol* **2000**;74:139–45.
  37. Hirsch CS, Toossi T, Johnson JL, et al. Augmentation of apoptosis and interferon-gamma production at sites of active *Mycobacterium tuberculosis* infection in human tuberculosis. *J Infect Dis* **2001**;183:779–88.
  38. Lawn SD, Butera ST. Incorporation of HLA-DR into the HIV-1 envelope: correlation with stage of disease and the effect of opportunistic infection in vivo. *J Virol* **2000**;74:10256–9.
  39. Castilletti C, Capobianchi MR, Fais S, et al. HIV type 1 grown on interferon- $\gamma$ -treated U937 cells shows selective increase in virion-associated intercellular adhesion molecule 1 and HLA-DR and enhanced infectivity for CD4-negative cells. *AIDS Res Hum Retroviruses* **1995**;11:547–53.
  40. Baron S, Tyring SK, Fleischmann WR Jr, et al. The interferons. Mechanisms of action and clinical applications. *JAMA* **1991**;266:1375–83.
  41. Rubin LA, Kurman CC, Fritz ME, et al. Soluble interleukin-2-receptors are released from activated human lymphoid cells in vitro. *J Immunol* **1985**;135:3172–7.
  42. Ziegler-Heitbrock HWL, Ulevitch RJ. CD14: cell surface receptor and differentiation marker. *Immunol Today* **1993**;14:121–5.
  43. Lawn SD, Labeta MO, Arias M, Acheampong JW, Griffin GE. Elevated serum concentrations of soluble CD14 in HIV-negative and HIV-positive patients with tuberculosis in Africa: prolonged elevation during anti-tuberculosis treatment. *Clin Exp Immunol* **2000**;120:483–7.
  44. Zhang Z, Schuler T, Zupancic M, et al. Sexual transmission and propagation of SIV and HIV in resting and activated CD4<sup>+</sup> T cells. *Science* **1999**;286:1353–7.
  45. Cantin R, Fortin JF, Lamontagne G, Tremblay M. The acquisition of host-derived major histocompatibility complex class II glycoproteins by human immunodeficiency virus type 1 accelerates the process of virus entry and infection in human T-lymphoid cells. *Blood* **1997**;90:1091–100.
  46. Cantin R, Fortin JF, Lamontagne G, Tremblay M. The presence of host-derived HLA-DR1 on human immunodeficiency virus type 1 increases viral infectivity. *J Virol* **1997**;71:1922–30.
  47. Esser MT, Bess JW Jr, Suryanarayana K, et al. Partial activation and induction of apoptosis in CD4(+) and CD8(+) T lymphocytes by conformationally authentic noninfectious human immunodeficiency virus type 1. *J Virol* **2001**;75:1152–64.
  48. Gercken B, Pryjma J, Ernst M, Flad HD. Defective antigen presentation by *Mycobacterium tuberculosis*-infected monocytes. *Infect Immun* **1994**;62:3472–8.
  49. Hmama Z, Gabathuler R, Jefferies WA, de Jong G, Reiner NE. Attenuation of HLA-DR expression by mononuclear phagocytes infected with *Mycobacterium tuberculosis* is related to intracellular sequestration of immature class II heterodimers. *J Immunol* **1998**;161:4882–93.
  50. Riedel DD, Kaufmann SH. Differential tolerance induction by lipoarabinomannan and lipopolysaccharide in human macrophages. *Microbes Infect* **2000**;2:463–71.
  51. Dentener MA, Bazil V, Von Asmuth EJU, Ceska M, Buurman WA. Involvement of CD14 in lipopolysaccharide-induced tumour necrosis factor- $\alpha$ , IL-6 and IL-8 release by human monocytes and alveolar macrophages. *J Immunol* **1993**;150:2885–91.
  52. Sada E, Aguilar D, Torres M, Herrera T. Detection of lipoarabinomannan as a diagnostic test for tuberculosis. *J Clin Microbiol* **1992**;30:2415–8.
  53. Huh HY, Pearce SF, Yesner LM, Schindler JL, Silverstein RL. Regulated expression of CD36 during monocyte-to-macrophage differentiation: potential role of CD36 in foam cell formation. *Blood* **1996**;87:2020–8.
  54. Yesner LM, Huh HY, Pearce SF, Silverstein RL. Regulation of monocyte CD36 and thrombospondin-1 expression by soluble mediators. *Arterioscler Thromb Vasc Biol* **1996**;16:1019–25.
  55. Folks TM, Clouse KA, Justement J, et al. Tumor necrosis factor alpha induces expression of human immunodeficiency virus in a chronically infected T-cell clone. *Proc Natl Acad Sci USA* **1989**;86:2365–8.
  56. Poli G, Bressler P, Kinter A, et al. Interleukin 6 induces human immunodeficiency virus expression in infected monocytic cells alone and in synergy with tumor necrosis factor alpha by transcriptional and post-transcriptional mechanisms. *J Exp Med* **1990**;172:151–8.
  57. Mach B, Steimle V, Martinez-Soria E, Reith W. Regulation of MHC class II genes: lessons from a disease. *Annu Rev Immunol* **1996**;14:301–31.
